# Supplementary material
Source: PubMed Central journal article supplement (PMC6422082)
Supplement: supp_RA118.005050_139655_2_supp_268914_plfkmk.pdf [file supp_RA118.005050_139655_2_supp_268914_plfkmk.pdf]

SUPPORTING INFORMATION

| Probe                 | Gene            | Average Expression | Log2FC | $p_{obs}$ | $p_{adj}$ |
|-----------------------|-----------------|--------------------|--------|-----------|-----------|
| 222787_s_at           | <i>TMEM106B</i> | 7.95               | 0.86   | 4.1E-14   | 1.3E-09   |
| 211122_s_at           | <i>CXCL11</i>   | 5.64               | -0.82  | 3.8E-13   | 6.2E-09   |
| 224549_x_at           |                 | 7.51               | -0.78  | 5.3E-12   | 5.7E-08   |
| 226675_s_at           | <i>MALAT1</i>   | 9.52               | -0.74  | 6.8E-11   | 5.5E-07   |
| 202687_s_at           | <i>TNFSF10</i>  | 6.77               | -0.72  | 1.9E-10   | 1.2E-06   |
| 224567_x_at           | <i>MALAT1</i>   | 10.97              | -0.71  | 4.0E-10   | 2.0E-06   |
| 219230_at             | <i>TMEM100</i>  | 8.05               | 0.71   | 4.3E-10   | 2.0E-06   |
| AFFX-r2-Bs-lys-5_at   |                 | 5.19               | 0.67   | 2.9E-09   | 1.2E-05   |
| 205809_s_at           | <i>WASL</i>     | 6.58               | -0.65  | 7.8E-09   | 2.8E-05   |
| 1558378_a_at          | <i>AHNAK2</i>   | 6.01               | -0.65  | 1.1E-08   | 3.5E-05   |
| 201996_s_at           | <i>SPEN</i>     | 8.80               | -0.65  | 1.2E-08   | 3.5E-05   |
| 222344_at             |                 | 6.88               | -0.64  | 2.0E-08   | 5.1E-05   |
| 202688_at             | <i>TNFSF10</i>  | 7.35               | -0.63  | 2.1E-08   | 5.1E-05   |
| 201340_s_at           | <i>ENC1</i>     | 7.28               | -0.63  | 2.4E-08   | 5.6E-05   |
| 210163_at             | <i>CXCL11</i>   | 5.17               | -0.62  | 5.2E-08   | 1.1E-04   |
| AFFX-r2-Bs-lys-M_at   |                 | 5.21               | 0.60   | 1.4E-07   | 2.8E-04   |
| 209257_s_at           | <i>SMC3</i>     | 7.09               | -0.59  | 1.5E-07   | 2.9E-04   |
| 205051_s_at           | <i>KIT</i>      | 7.63               | -0.59  | 1.6E-07   | 2.9E-04   |
| 208621_s_at           | <i>EZR</i>      | 7.23               | -0.59  | 2.0E-07   | 3.4E-04   |
| 1558924_s_at          | <i>CLIP1</i>    | 5.44               | -0.58  | 2.9E-07   | 4.6E-04   |
| 204567_s_at           | <i>ABCG1</i>    | 8.09               | -0.58  | 3.3E-07   | 0.001     |
| 208624_s_at           | <i>EIF4G1</i>   | 8.57               | -0.57  | 5.2E-07   | 0.001     |
| 200835_s_at           | <i>MAP4</i>     | 9.01               | -0.56  | 7.5E-07   | 0.001     |
| 220037_s_at           | <i>LYVE1</i>    | 8.63               | -0.56  | 7.8E-07   | 0.001     |
| 1552526_at            | <i>FAM71C</i>   | 5.23               | 0.55   | 1.2E-06   | 0.002     |
| 242877_at             |                 | 4.71               | 0.55   | 1.3E-06   | 0.002     |
| 1568803_at            |                 | 4.68               | 0.55   | 1.4E-06   | 0.002     |
| 204014_at             | <i>DUSP4</i>    | 8.35               | -0.54  | 1.5E-06   | 0.002     |
| AFFX-ThrX-M_at        |                 | 6.42               | 0.54   | 1.7E-06   | 0.002     |
| 208859_s_at           | <i>ATRX</i>     | 6.64               | -0.54  | 1.7E-06   | 0.002     |
| 201615_x_at           | <i>CALD1</i>    | 7.53               | -0.54  | 2.0E-06   | 0.002     |
| 205651_x_at           | <i>RAPGEF4</i>  | 6.34               | -0.54  | 2.1E-06   | 0.002     |
| AFFX-LysX-3_at        |                 | 6.75               | 0.53   | 2.5E-06   | 0.002     |
| 239579_at             | <i>EPHX4</i>    | 4.99               | -0.53  | 2.5E-06   | 0.002     |
| 1553185_at            | <i>RASEF</i>    | 8.83               | -0.53  | 2.8E-06   | 0.002     |
| 219387_at             | <i>CCDC88A</i>  | 5.62               | -0.53  | 2.8E-06   | 0.002     |
| 1555928_at            |                 | 5.56               | -0.53  | 2.9E-06   | 0.002     |
| 206665_s_at           | <i>BCL2L1</i>   | 5.29               | -0.52  | 4.0E-06   | 0.003     |
| 217028_at             | <i>CXCR4</i>    | 9.49               | -0.52  | 4.4E-06   | 0.004     |
| 201867_s_at           | <i>TBL1X</i>    | 6.49               | -0.52  | 4.7E-06   | 0.004     |
| AFFX-r2-Bs-thr-M_s_at |                 | 8.04               | 0.51   | 5.8E-06   | 0.005     |

|                     |                                             |       |       |         |       |
|---------------------|---------------------------------------------|-------|-------|---------|-------|
| 208900_s_at         | <i>TOP1</i>                                 | 7.27  | -0.51 | 6.0E-06 | 0.005 |
| 203032_s_at         | <i>FH</i>                                   | 8.67  | -0.51 | 6.2E-06 | 0.005 |
| 215043_s_at         | <i>GUSBP3</i><br><i>SMA5</i><br><i>SMA4</i> | 5.64  | -0.51 | 7.5E-06 | 0.005 |
| 224563_at           | <i>WASF2</i>                                | 7.26  | -0.51 | 7.6E-06 | 0.005 |
| AFFX-r2-Bs-dap-3_at |                                             | 10.03 | 0.50  | 8.9E-06 | 0.006 |
| AFFX-PheX-5_at      |                                             | 6.21  | 0.50  | 9.2E-06 | 0.006 |
| 210935_s_at         | <i>WDR1</i>                                 | 8.67  | -0.50 | 9.3E-06 | 0.006 |
| 241926_s_at         | <i>ERG</i>                                  | 9.45  | -0.50 | 1.0E-05 | 0.007 |
| 208930_s_at         | <i>ILF3</i>                                 | 8.27  | -0.50 | 1.1E-05 | 0.007 |
| 236684_at           | <i>CNOT9</i>                                | 4.93  | 0.50  | 1.1E-05 | 0.007 |
| 1553673_at          | <i>STK35</i>                                | 6.01  | 0.50  | 1.2E-05 | 0.007 |
| 1557836_at          | <i>ELMOD2</i>                               | 6.48  | 0.49  | 1.5E-05 | 0.009 |
| 209183_s_at         | <i>C10orf10</i>                             | 9.47  | -0.49 | 1.7E-05 | 0.010 |
| 1554761_a_at        | <i>DNAAF5</i>                               | 7.48  | -0.49 | 1.8E-05 | 0.011 |
| 1554333_at          | <i>DNAJA4</i>                               | 5.81  | -0.48 | 1.9E-05 | 0.011 |
| 236620_at           | <i>RIF1</i>                                 | 6.89  | -0.48 | 2.2E-05 | 0.013 |
| 1554710_at          | <i>KCNMB1</i>                               | 4.33  | 0.48  | 2.2E-05 | 0.013 |
| 229274_at           | <i>GNAS</i>                                 | 6.23  | -0.48 | 2.3E-05 | 0.013 |
| 216700_at           | <i>TRIO</i>                                 | 6.60  | 0.48  | 2.5E-05 | 0.013 |
| 208879_x_at         | <i>PRPF6</i>                                | 7.60  | -0.48 | 2.5E-05 | 0.013 |
| 206978_at           | <i>CCR2</i>                                 | 5.10  | 0.48  | 2.5E-05 | 0.013 |
| 221683_s_at         | <i>CEP290</i>                               | 6.06  | -0.47 | 2.8E-05 | 0.015 |
| 232063_x_at         | <i>FARSB</i>                                | 5.74  | 0.47  | 3.0E-05 | 0.015 |
| 230746_s_at         |                                             | 4.66  | -0.47 | 3.1E-05 | 0.015 |
| 38241_at            | <i>BTN3A3</i>                               | 5.52  | -0.47 | 3.3E-05 | 0.016 |
| 230040_at           | <i>ADAMTS18</i>                             | 9.36  | -0.47 | 3.4E-05 | 0.016 |
| 1560642_at          |                                             | 4.26  | -0.47 | 3.4E-05 | 0.016 |
| 239491_at           | <i>CERS5</i>                                | 4.93  | 0.47  | 3.8E-05 | 0.018 |
| 236966_at           | <i>ARMC8</i>                                | 6.08  | 0.47  | 3.8E-05 | 0.018 |
| 212650_at           | <i>EHBP1</i>                                | 6.26  | -0.47 | 4.0E-05 | 0.018 |
| 242856_at           | <i>SNHG24</i>                               | 6.10  | 0.46  | 4.0E-05 | 0.018 |
| AFFX-r2-Bs-lys-3_at |                                             | 6.31  | 0.46  | 4.0E-05 | 0.018 |
| 211077_s_at         | <i>TLK1</i>                                 | 6.51  | -0.46 | 4.0E-05 | 0.018 |
| 212675_s_at         | <i>CEP68</i>                                | 8.17  | -0.46 | 4.1E-05 | 0.018 |
| 209258_s_at         | <i>SMC3</i>                                 | 6.25  | -0.46 | 4.1E-05 | 0.018 |
| AFFX-ThrX-3_at      |                                             | 7.97  | 0.46  | 4.3E-05 | 0.018 |
| 234442_at           |                                             | 6.13  | 0.46  | 4.5E-05 | 0.018 |
| 222340_at           |                                             | 4.47  | 0.46  | 4.5E-05 | 0.018 |
| 214329_x_at         | <i>TNFSF10</i>                              | 7.13  | -0.46 | 4.5E-05 | 0.018 |
| 234758_at           |                                             | 3.96  | -0.46 | 4.7E-05 | 0.019 |
| 231461_at           | <i>KRT71</i>                                | 5.53  | 0.46  | 4.7E-05 | 0.019 |
| 203347_s_at         | <i>MTF2</i>                                 | 7.17  | -0.46 | 4.8E-05 | 0.019 |

|                       |                                     |       |       |         |       |
|-----------------------|-------------------------------------|-------|-------|---------|-------|
| 216953_s_at           | <i>WT1</i>                          | 6.17  | 0.46  | 5.1E-05 | 0.020 |
| 205952_at             | <i>KCNK3</i>                        | 4.79  | 0.46  | 5.1E-05 | 0.020 |
| 244026_at             |                                     | 5.21  | 0.46  | 5.4E-05 | 0.020 |
| 217320_at             | <i>LOC100293211</i>                 | 4.58  | 0.46  | 5.4E-05 | 0.020 |
| 1557910_at            | <i>HSP90AB1</i>                     | 11.64 | -0.46 | 5.8E-05 | 0.021 |
| AFFX-r2-Bs-thr-3_s_at |                                     | 8.48  | 0.45  | 6.6E-05 | 0.024 |
| 227152_at             | <i>KIAA1551</i>                     | 6.32  | -0.45 | 7.0E-05 | 0.025 |
| 1555926_a_at          |                                     | 5.23  | -0.45 | 7.0E-05 | 0.025 |
| 219424_at             | <i>EBI3</i>                         | 5.52  | -0.45 | 7.7E-05 | 0.027 |
| 201538_s_at           | <i>DUSP3</i>                        | 7.48  | -0.45 | 7.9E-05 | 0.027 |
| 219754_at             | <i>RBM41</i>                        | 7.38  | -0.45 | 7.9E-05 | 0.027 |
| 208325_s_at           | <i>AKAP13</i>                       | 6.26  | -0.45 | 8.1E-05 | 0.028 |
| 223292_s_at           | <i>MRPS15</i>                       | 6.42  | 0.45  | 8.2E-05 | 0.028 |
| 232731_x_at           | <i>RAMP2-AS1</i>                    | 4.42  | -0.45 | 8.4E-05 | 0.028 |
| 227939_s_at           | <i>TRA2A</i>                        | 4.31  | 0.44  | 9.0E-05 | 0.030 |
| 1558214_s_at          | <i>CTNNA1</i>                       | 7.16  | -0.44 | 9.1E-05 | 0.030 |
| 1560255_at            | <i>CELF2-AS1</i>                    | 5.96  | 0.44  | 9.6E-05 | 0.031 |
| 231999_at             | <i>ANKRD11</i>                      | 8.13  | -0.44 | 9.6E-05 | 0.031 |
| 1566030_at            |                                     | 4.33  | 0.44  | 1.0E-04 | 0.032 |
| 235730_at             | <i>NUTM2B-AS1</i>                   | 5.07  | -0.44 | 1.0E-04 | 0.032 |
| 243235_at             |                                     | 5.12  | 0.44  | 1.1E-04 | 0.034 |
| 219730_at             | <i>LOC100996782</i><br><i>MED18</i> | 6.49  | 0.44  | 1.1E-04 | 0.035 |
| 211767_at             | <i>GINS4</i>                        | 5.13  | 0.44  | 1.1E-04 | 0.035 |
| 1564494_s_at          | <i>P4HB</i>                         | 10.89 | -0.44 | 1.1E-04 | 0.035 |
| 1564733_at            |                                     | 6.94  | 0.44  | 1.2E-04 | 0.035 |
| 244100_at             |                                     | 5.31  | -0.44 | 1.2E-04 | 0.035 |
| 222877_at             | <i>NRP2</i>                         | 9.23  | -0.44 | 1.2E-04 | 0.036 |
| 210875_s_at           | <i>ZEB1</i>                         | 9.41  | -0.44 | 1.2E-04 | 0.036 |
| 212364_at             | <i>MYO1B</i>                        | 9.18  | -0.43 | 1.2E-04 | 0.036 |
| AFFX-r2-Bs-phe-5_at   |                                     | 6.32  | 0.43  | 1.3E-04 | 0.038 |
| 1569325_at            | <i>ARPC5</i>                        | 6.32  | 0.43  | 1.3E-04 | 0.038 |
| 236377_at             | <i>TMEM132D</i>                     | 5.21  | 0.43  | 1.4E-04 | 0.039 |
| 200920_s_at           | <i>BTG1</i>                         | 10.35 | -0.43 | 1.4E-04 | 0.039 |
| 209821_at             | <i>IL33</i>                         | 9.56  | -0.43 | 1.4E-04 | 0.039 |
| 207908_at             | <i>KRT2</i>                         | 6.03  | 0.43  | 1.4E-04 | 0.039 |
| 219059_s_at           | <i>LYVE1</i>                        | 9.78  | -0.43 | 1.5E-04 | 0.039 |
| 243193_at             |                                     | 4.15  | 0.43  | 1.5E-04 | 0.039 |
| 212009_s_at           | <i>STIP1</i>                        | 9.36  | -0.43 | 1.5E-04 | 0.039 |
| 209127_s_at           | <i>SART3</i>                        | 7.71  | -0.43 | 1.5E-04 | 0.040 |
| 218723_s_at           | <i>RGCC</i>                         | 9.72  | -0.43 | 1.5E-04 | 0.040 |
| 204595_s_at           | <i>STC1</i>                         | 7.68  | -0.43 | 1.6E-04 | 0.041 |
| 221400_at             | <i>MYO3A</i>                        | 5.20  | 0.43  | 1.6E-04 | 0.041 |
| 1566082_at            |                                     | 4.83  | 0.43  | 1.6E-04 | 0.041 |

|                     |                                      |       |       |         |       |
|---------------------|--------------------------------------|-------|-------|---------|-------|
| 226623_at           | <i>PHYHIPL</i>                       | 5.62  | 0.43  | 1.6E-04 | 0.041 |
| AFFX-PheX-M_at      |                                      | 6.68  | 0.43  | 1.6E-04 | 0.041 |
| 237300_at           | <i>PSMA3</i>                         | 5.89  | 0.43  | 1.7E-04 | 0.041 |
| 242930_at           | <i>OSGEP</i>                         | 5.05  | 0.43  | 1.7E-04 | 0.041 |
| 214119_s_at         | <i>LOC101929368</i><br><i>FKBP1A</i> | 12.64 | -0.43 | 1.7E-04 | 0.041 |
| 232178_at           | <i>ZNF503</i>                        | 6.49  | 0.43  | 1.7E-04 | 0.042 |
| 224254_x_at         |                                      | 8.29  | -0.43 | 1.7E-04 | 0.042 |
| 238916_at           | <i>LINC00938</i>                     | 4.81  | -0.42 | 1.8E-04 | 0.044 |
| 239571_at           |                                      | 6.28  | -0.42 | 1.9E-04 | 0.045 |
| 229450_at           | <i>IFIT3</i>                         | 6.09  | -0.42 | 1.9E-04 | 0.046 |
| AFFX-r2-Bs-dap-M_at |                                      | 9.26  | 0.42  | 1.9E-04 | 0.046 |
| 217019_at           |                                      | 7.34  | -0.42 | 2.0E-04 | 0.047 |
| 207642_at           | <i>HCRT</i>                          | 5.77  | 0.42  | 2.0E-04 | 0.047 |
| 216598_s_at         | <i>CCL2</i>                          | 9.96  | -0.42 | 2.0E-04 | 0.047 |
| 237227_at           | <i>NEK10</i>                         | 5.71  | -0.42 | 2.0E-04 | 0.047 |
| 236071_at           | <i>C9orf135-AS1</i>                  | 4.47  | 0.42  | 2.1E-04 | 0.048 |
| 226901_at           | <i>C17orf58</i>                      | 9.57  | -0.42 | 2.1E-04 | 0.048 |
| 240284_x_at         | <i>LOC105369635</i>                  | 5.24  | 0.42  | 2.1E-04 | 0.048 |
| 201679_at           | <i>SRRT</i>                          | 5.56  | -0.42 | 2.2E-04 | 0.048 |
| AFFX-DapX-3_at      |                                      | 9.47  | 0.42  | 2.2E-04 | 0.048 |
| 214718_at           | <i>GATAD1</i>                        | 8.88  | -0.42 | 2.3E-04 | 0.049 |

**Table S1. List of 147 probes/genes differentially expressed between siNC and siANRIL transfected HUVECs from the GeneChip microarray analysis.** Fold changes between the two groups are shown in a log<sub>2</sub> scale and *P* values were determined by two-way ANOVA.

| Name          | Sequence                  | Name       | Sequence                |
|---------------|---------------------------|------------|-------------------------|
| ABCG1_F       | GAGGGATTTGGGTCTGAACTGC    | GAPDH_F    | GTCTCCTCTGACTCAACAGCG   |
| ABCG1_R       | TCTCACCAGCCGACTGTTCTGA    | GAPDH_R    | ACCACCCTGTTGCTGTAGCCAA  |
| AHNAK2_F      | TCCTGGTGGAAGCGAGATTCAG    | KIT_F      | CACCGAAGGAGGCACTTACACA  |
| AHNAK2_R      | ACCACCTGTGACACTGTAGCCA    | KIT_R      | TGCCATTACAGAGCCTGTCGTA  |
| ANRIL_total_F | GCCTCATTCTGATTCAACAGC     | LYVE1_F    | GCCGACAGTTTGCAGCCTATTG  |
| ANRIL_total_R | GATCTCCCCGGTTTTCTTCT      | LYVE1_R    | CCGAGTAGGTACTGTCACTGAC  |
| ANRIL_DQ_F    | CCACATCCCTTGAGTAATGA      | MAP4_F     | CCTTGCTTCAGGCTTAGTGCCA  |
| ANRIL_DQ_R    | CCTTTTATCACCCAGCTTCG      | MAP4_R     | GCTTCTCAGGAGCCTTTGCATC  |
| ANRIL_NR_F    | AACCTGAGCAGCTGGGACTA      | MTAP_F     | GTCATAGTGACCACAGCTGTGG  |
| ANRIL_NR_R    | TGTGTCCATAGCACCTCCA       | MTAP_R     | CCTCTGGCACAAGAATGACTTCC |
| CDKN2A_F      | CTCGTGCTGATGCTACTGAGGA    | SMC3_F     | ATGCGTGGAAGTCACTGCTGGA  |
| CDKN2A_R      | GGTCGGCGCAGTTGGGCTCC      | SMC3_R     | GCAGAAAAGTAACCTCTCCAGG  |
| CDKN2B_F      | ACGGAGTCAACCGTTTCGGGAG    | SPEN_F     | GATTCTCTCCACACCTGACTTC  |
| CDKN2B_R      | GGTCGGGTGAGAGTGGCAGG      | SPEN_R     | TGTTGCCAGAGACGAAGTGGAG  |
| CLIP1_F       | AGAAGACGCTGCTGGACACAGA    | TMEM100_F  | ACAGTCCCTCTGGTCAGTGAGA  |
| CLIP1_R       | TGGCATCTTCCGCTGTTGAGC     | TMEM100_R  | GGCGATGAAGACAACCACAGCA  |
| CXCL11_F      | AAGGACAACGATGCCTAAATCCC   | TMEM106B_F | CCTACTTGTGAGGGAACAGGAAG |
| CXCL11_R      | CAGATGCCCTTTTCCAGGACTTC   | TMEM106B_R | AACACAGCCAATCCAGAAAGGAG |
| EIF4G1_F      | GCCATTCAGAGCCCAACTTCTC    | TNFSF10_F  | TGGCAACTCCGTCAGCTCGTTA  |
| EIF4G1_R      | CGGAAGTTCACAGTCACTGTTGG   | TNFSF10_R  | AGCTGCTACTCTCTGAGGACCT  |
| ENC1_F        | AGACGTGTGGAACAGCATCACC    | WASL_F     | AAAGTGGAGCAGAACAGTCGGC  |
| ENC1_R        | CATATTATCTCATCGAGTGATGGAG | WASL_R     | GTTGGTGGTGTAGACTCTTGGC  |
| EZR_F         | ATCGAGGTGCAGCAGATGAAGG    |            |                         |
| EZR_R         | CGCAGCATCAACTCCTCCTTCT    |            |                         |

**Table S2. List of primers for *ANRIL* and its top downstream gene candidates that were used in semiquantitative and quantitative RT-PCR analysis.**

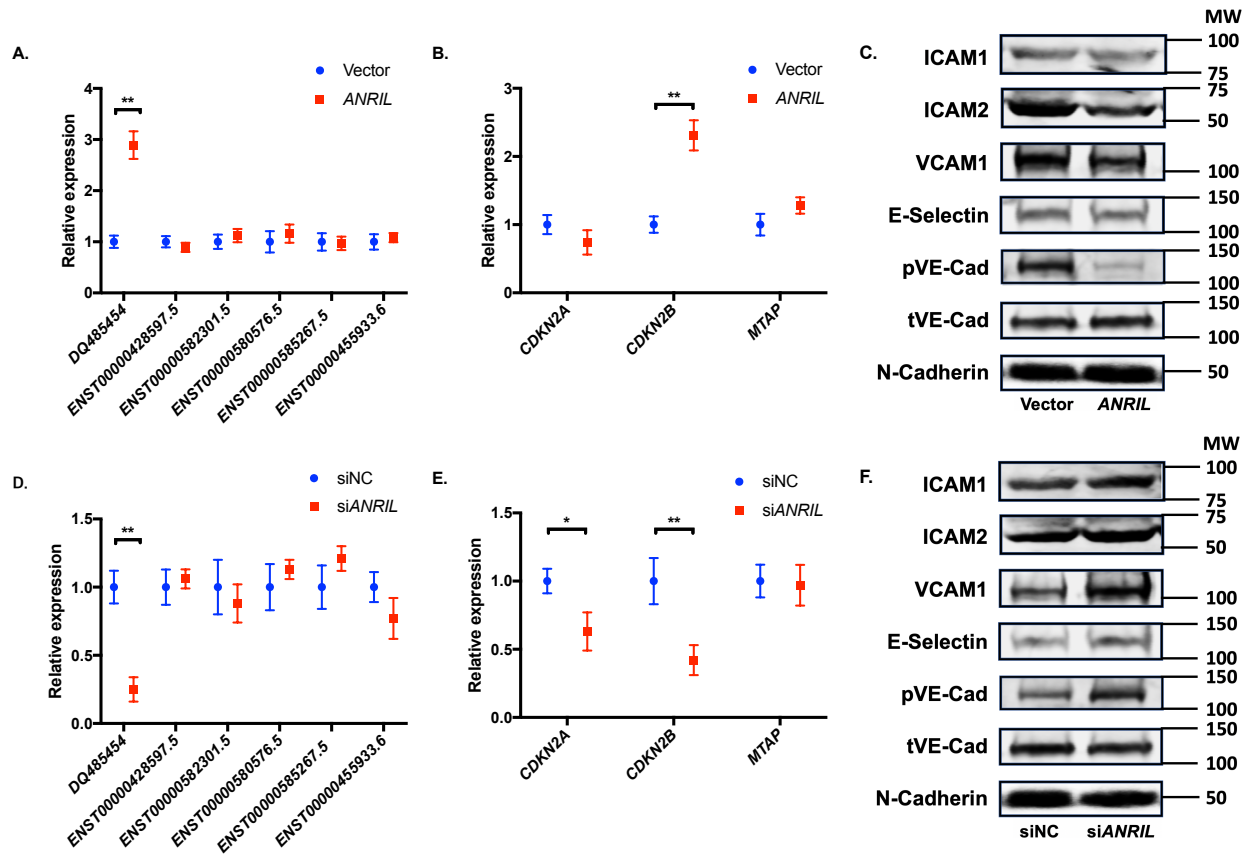

**Figure S1. Effects of overexpression and knockdown of *ANRIL* (*DQ485454*) on expression of its neighboring genes and genes for endothelial cell adhesion molecules in HCAECs.**

**A:** Specific overexpression of *ANRIL* transcript *DQ485454* in HCAECs transfected with the pcDNA3.1-*ANRIL* plasmid as determined by real-time qRT-PCR analysis. **B:** Effects of overexpression of *ANRIL* transcript *DQ485454* on expression of *CDKN2A*, *CDKN2B*, and *MTAP*. **C:** Effects of overexpression of *ANRIL* transcript *DQ485454* on expression of genes encoding EC adhesion molecules in HCAECs as determined Western blot analysis. **D:** Specific knockdown of *ANRIL* transcript *DQ485454* in HCAECs transfected with *ANRIL* siRNA (si*ANRIL*) as determined by real-time qRT-PCR analysis. **E:** Effects of knockdown of *ANRIL* transcript *DQ485454* on expression of *CDKN2A*, *CDKN2B*, and *MTAP*. **F:** Effects of knockdown of *ANRIL* transcript *DQ485454* on expression of genes encoding EC adhesion molecules in HCAECs as determined Western blot analysis. Western blot analysis was carried out using plasma membrane protein extracts isolated by biotinylation. \* $P < 0.05$ , \*\* $P < 0.01$ ,  $n = 3/\text{group}$ . Only statistically significant values are marked with asterisk.

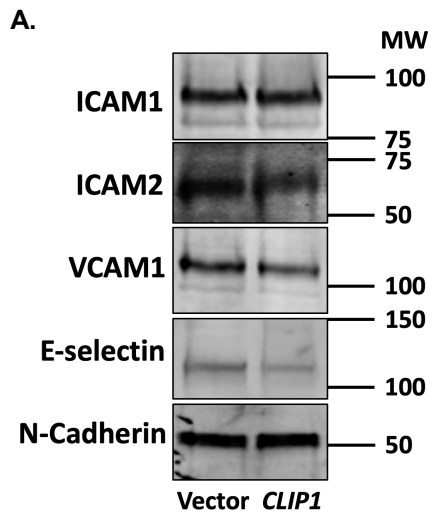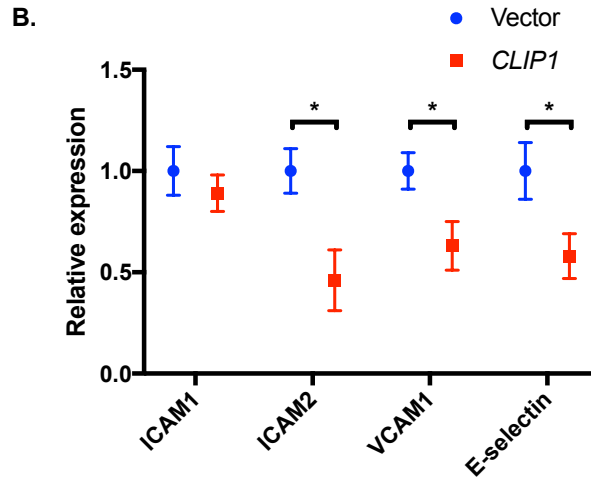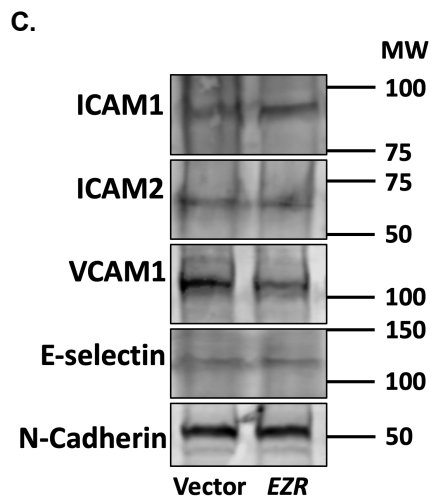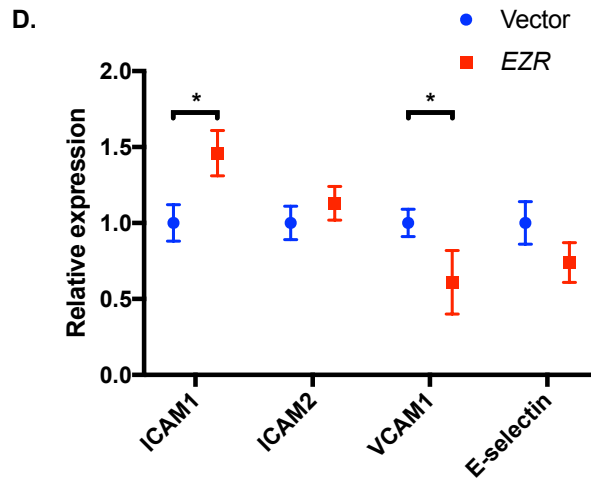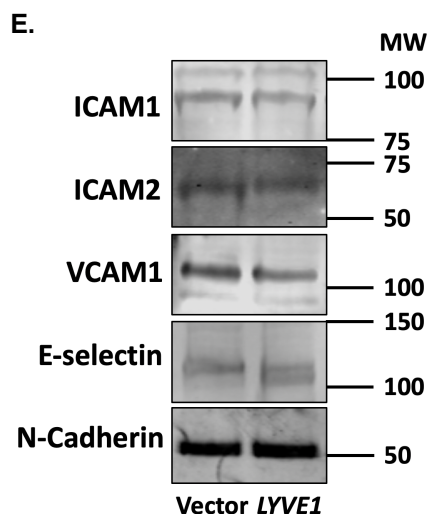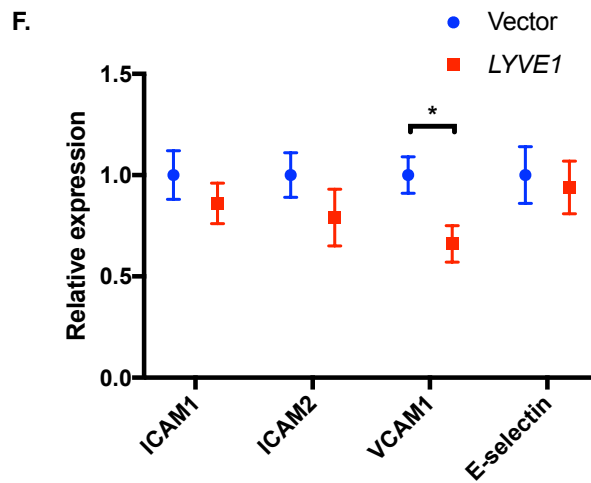

**Figure S2. Effects of overexpression of *CLIP1*, *EZR* and *LYVE1* on expression of genes encoding endothelial cell adhesion molecules.**

**A:** Western blot analysis of cell adhesion proteins (ICAM-1, ICAM-2, VCAM-1, and E-selectin) from plasma membrane protein extracts of HCAECs transfected with pcDNA3.1 vector or pcDNA3.1-*CLIP1*. **B:** Western blot images in (A) were quantified and plotted. **C:** Western blot analysis of cell adhesion proteins (ICAM-1, ICAM-2, VCAM-1, and E-selectin) from plasma membrane protein extracts of HCAECs transfected with pcDNA3.1 vector or pcDNA3.1-*EZR*. **D:** Western blot images in (C) were quantified and plotted. **E:** Western blot analysis of cell adhesion proteins (ICAM-1, ICAM-2, VCAM-1, and E-selectin) from plasma membrane protein extracts of HCAECs transfected with pcDNA3.1 vector or pcDNA3.1-*LYVE1*. **F:** Western blot images in (E) were quantified and plotted. \* $P < 0.05$ ,  $n = 3$ /group. N-Cadherin was used as loading control. Data were normalized to the baseline N-Cadherin expression, which was defined as 1.0. Only statistically significant values are marked with asterisk.

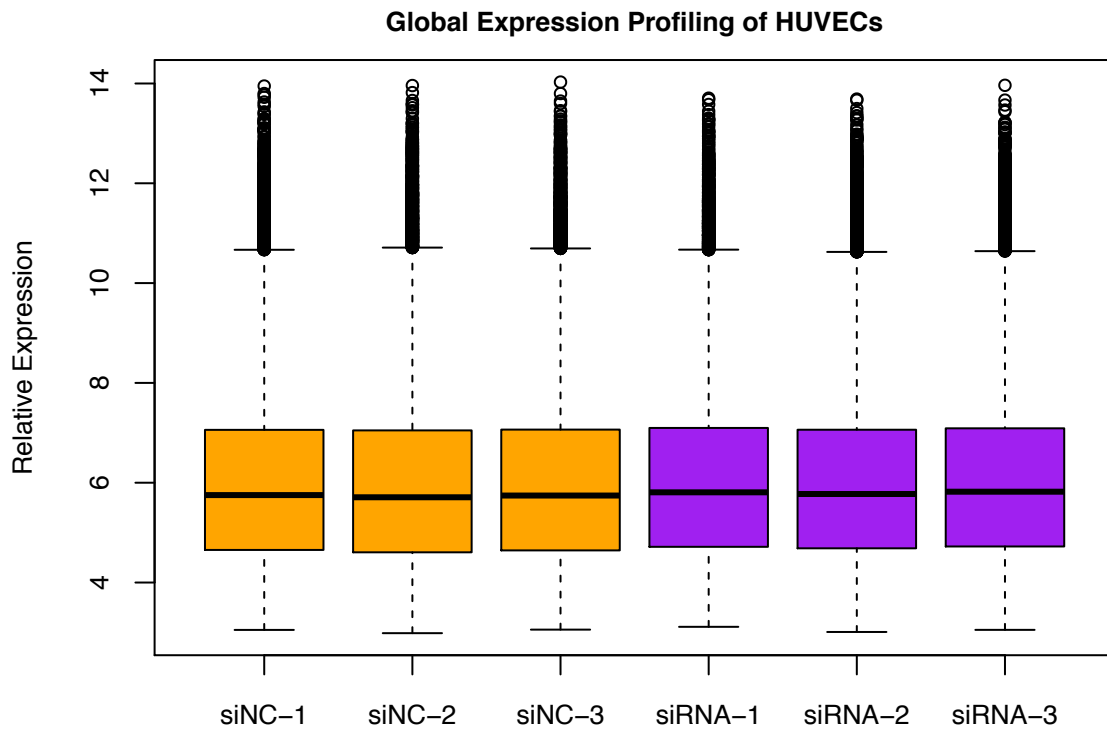

**Figure S3. Genome-wide expression profiling of 6 RNA samples (3 siNC vs. 3 si*ANRIL*) from the GeneChip microarray analysis**



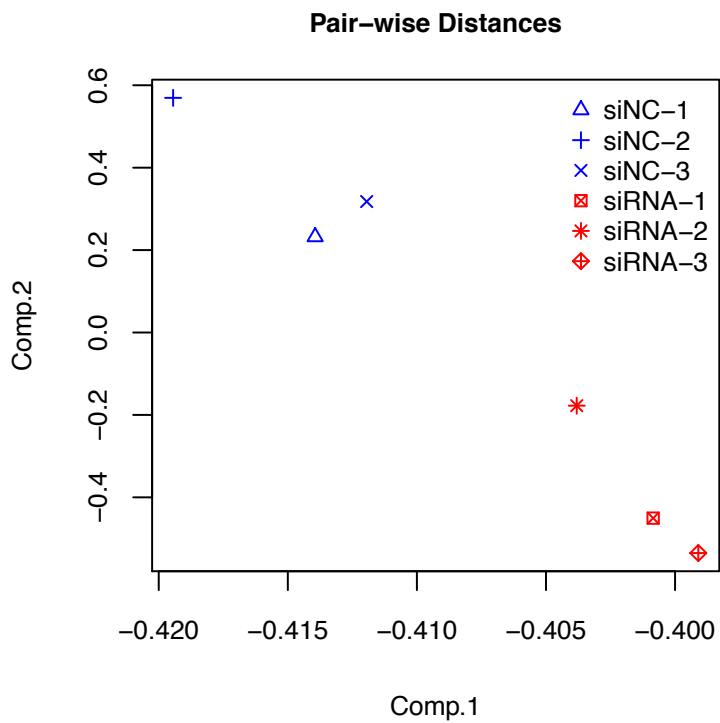

**Figure S4. PCA plot of 6 samples from the GeneChip microarray analysis.** X-axis and Y-axis represent the first two principal components derived using genome-wide expression data.
